# Supplementary material
Source: Royal Society of Chemistry journal article supplement (doi:10.1039/d5bm01657f)
Supplement: d5bm01657f1.pdf [file d5bm01657f1.pdf]

## Supplementary Information

### **Two-dimensional GeTe nanosheets for psoriasis through modulation of macrophage activation and psoriatic inflammation**

Jieun Han,<sup>a,b</sup> Ju-Won Kim,<sup>a,b</sup> In Kang,<sup>a</sup> Sun-Mi Lee<sup>\*a</sup> and Yong-Beom Park<sup>\*a,b,c</sup>

<sup>a</sup> Division of Rheumatology, Department of Internal Medicine, Yonsei University College of Medicine, Seoul, 03722, Republic of Korea

<sup>b</sup> Brain Korea 21 PLUS Project for Medical Science, Yonsei University College of Medicine, Seoul, 03722, Republic of Korea

<sup>c</sup> Institute for Immunology and Immunological Diseases, Yonsei University College of Medicine, Seoul, 03722, Republic of Korea

\* Co-corresponding authors: [sunmilee@yuhs.ac](mailto:sunmilee@yuhs.ac), [yongbpark@yuhs.ac](mailto:yongbpark@yuhs.ac)

## **Section 1. Experimental Section**

### **Enzyme-linked immunosorbent assay (ELISA)**

The levels of IL-1 $\beta$  and IL-6 in the supernatant samples of RAW 264.7 cells were analyzed using ELISA kits according to the manufacturers' instructions. IL-1 $\beta$  and IL-6 levels were measured using the BD OptEIA™ Mouse IL-1 $\beta$  ELISA Set and BD OptEIA™ Mouse IL-6 ELISA Set (BD Biosciences, Franklin Lakes, NJ, USA), respectively.

### **Immunofluorescence staining of skin tissues**

Immunofluorescence (IF) staining was performed to evaluate the expression of F4/80, CD4, and filaggrin in skin lesions. Dorsal skin samples were collected from mice and fixed with 10% formalin for 72 h. The tissues were subsequently dehydrated, embedded in paraffin, and sectioned into 4- $\mu$ m thick slices. Paraffin sections were deparaffinized and rehydrated through a graded ethanol series. Antigen retrieval was conducted using 1M sodium citrate buffer (pH 6.0; Biosolution, Seoul, Republic of Korea). Endogenous peroxidase activity was quenched by incubation with 3% hydrogen peroxidase for 10 min, followed by washing with Tris-buffered saline (TBS) buffer. The slides were incubated overnight at 4°C with primary antibodies against F4/80 (Invitrogen, Carlsbad, CA, USA), CD4 (Santa Cruz Biotechnology, Dallas, TX, USA), and filaggrin (BioLegend, San Diego, CA, USA). After washing with TBS buffer, the samples were further stained with secondary antibodies (Invitrogen) for 1 h in room temperature. Finally, nuclei were counterstained using antifade mounting medium containing DAPI (Vector Laboratories, Newark, CA, USA). IF images were obtained with a Zeiss LSM 780 confocal microscope (Carl Zeiss MicroImaging GmbH, Oberkochen, Germany) and analyzed with Zen 3.1 software and ImageJ.

## Section 2. Figures

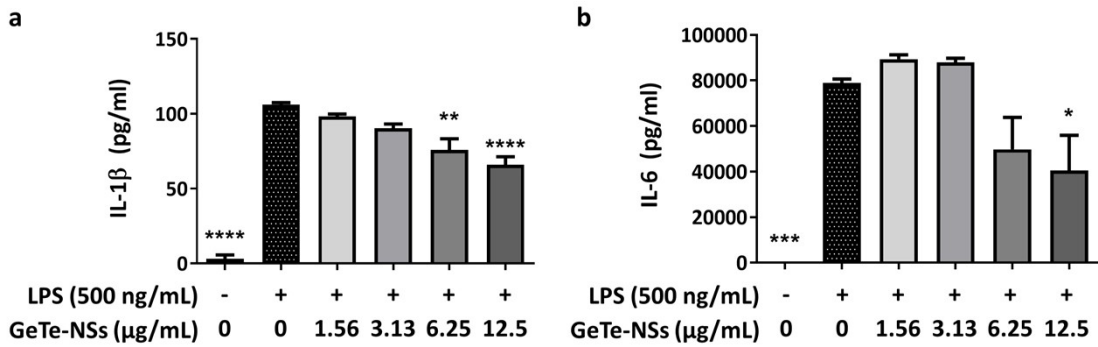

**Fig. S1.** Regulation of GeTe-NSs on LPS-induced IL-1 $\beta$  and IL-6 release in RAW 264.7 cells. RAW 264.7 cells were treated simultaneously with LPS (500 ng/mL) and the indicated concentrations of GeTe-NSs. After 24 h incubation, the cytokine levels of (a) IL-1 $\beta$  and (b) IL-6 in the supernatants were measured by ELISA kits. All data are presented as the mean  $\pm$  SEM for three independent experiments. Statistical significance was determined by one-way ANOVA in comparison with the LPS-stimulated RAW 264.7 samples. \* $p$  < 0.05, \*\* $p$  < 0.01, \*\*\* $p$  < 0.001, \*\*\*\* $p$  < 0.0001.

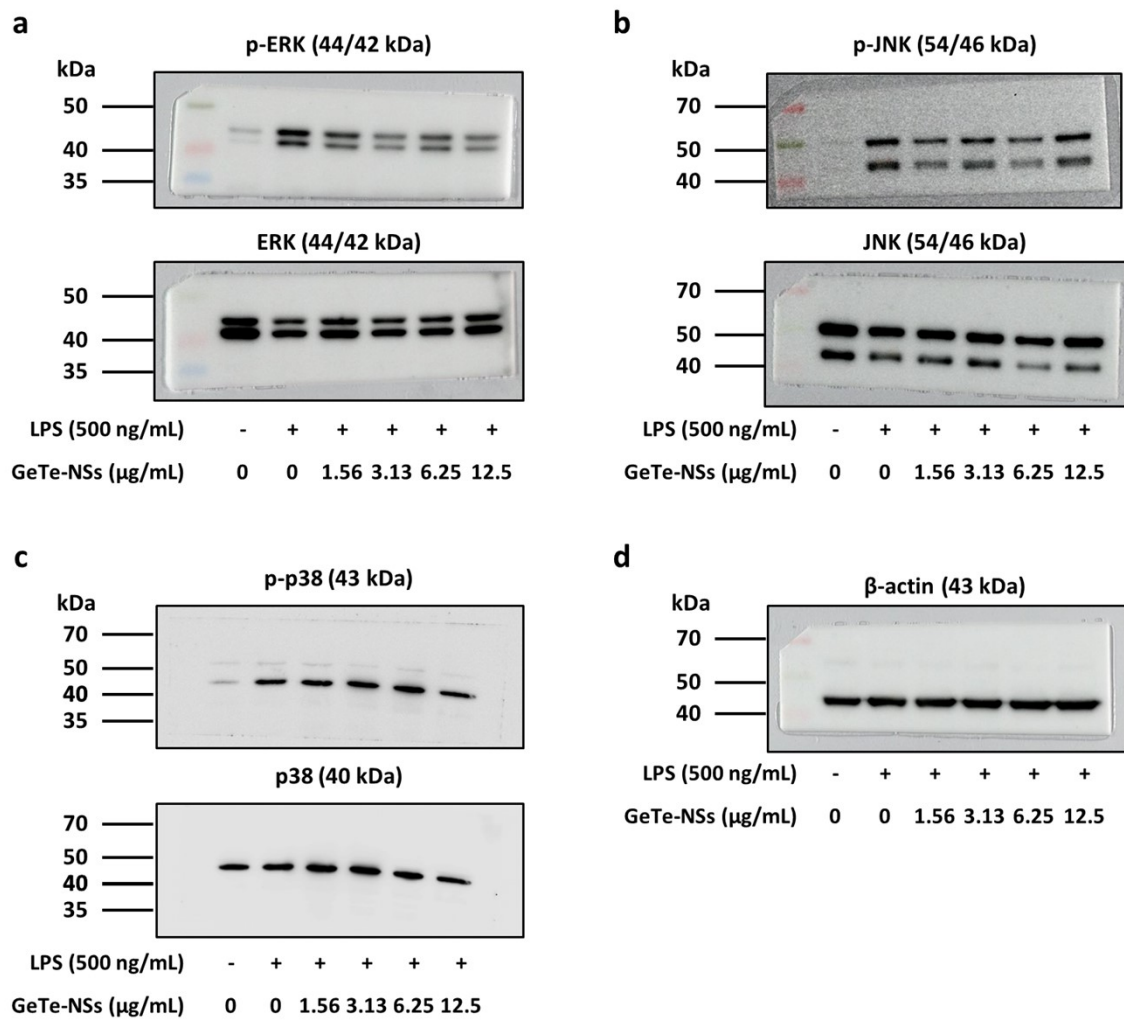

**Fig. S2** Uncropped Western blot images of phosphorylated and total proteins related to MAPK pathways in RAW 264.7 cells. (a) p-ERK and ERK (stripped in order: p-ERK → ERK), (b) p-JNK and JNK (stripped in order: p-JNK → JNK), (c) p-p38 and p38 (stripped in order: p-p38 → p38). (d) β-actin. The cropped versions of these blots are shown in Fig. 5a.

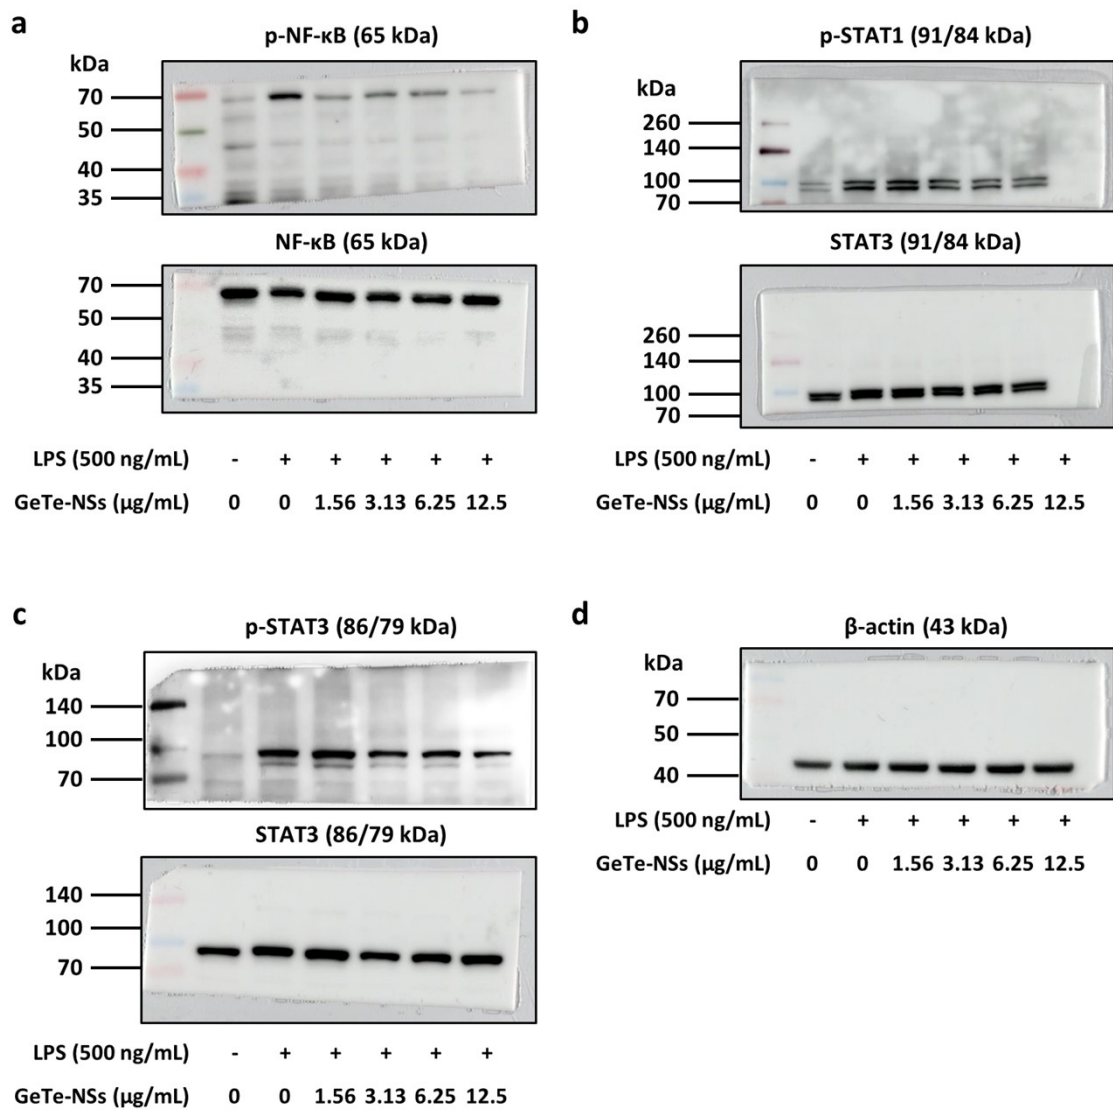

**Fig. S3** Uncropped Western blot images of phosphorylated and total proteins related to NF-κB, STAT1, and STAT3 pathways in RAW 264.7 cells. (a) p-NF-κB and NF-κB (stripped in order: p-NF-κB → NF-κB). (b) p-STAT1 and STAT1 (stripped in order: p-STAT1 → STAT1). (c) p-STAT3 and STAT3 (stripped in order: p-STAT3 → STAT3). (d) β-actin. The cropped versions of these blots are shown in Fig. 5b.

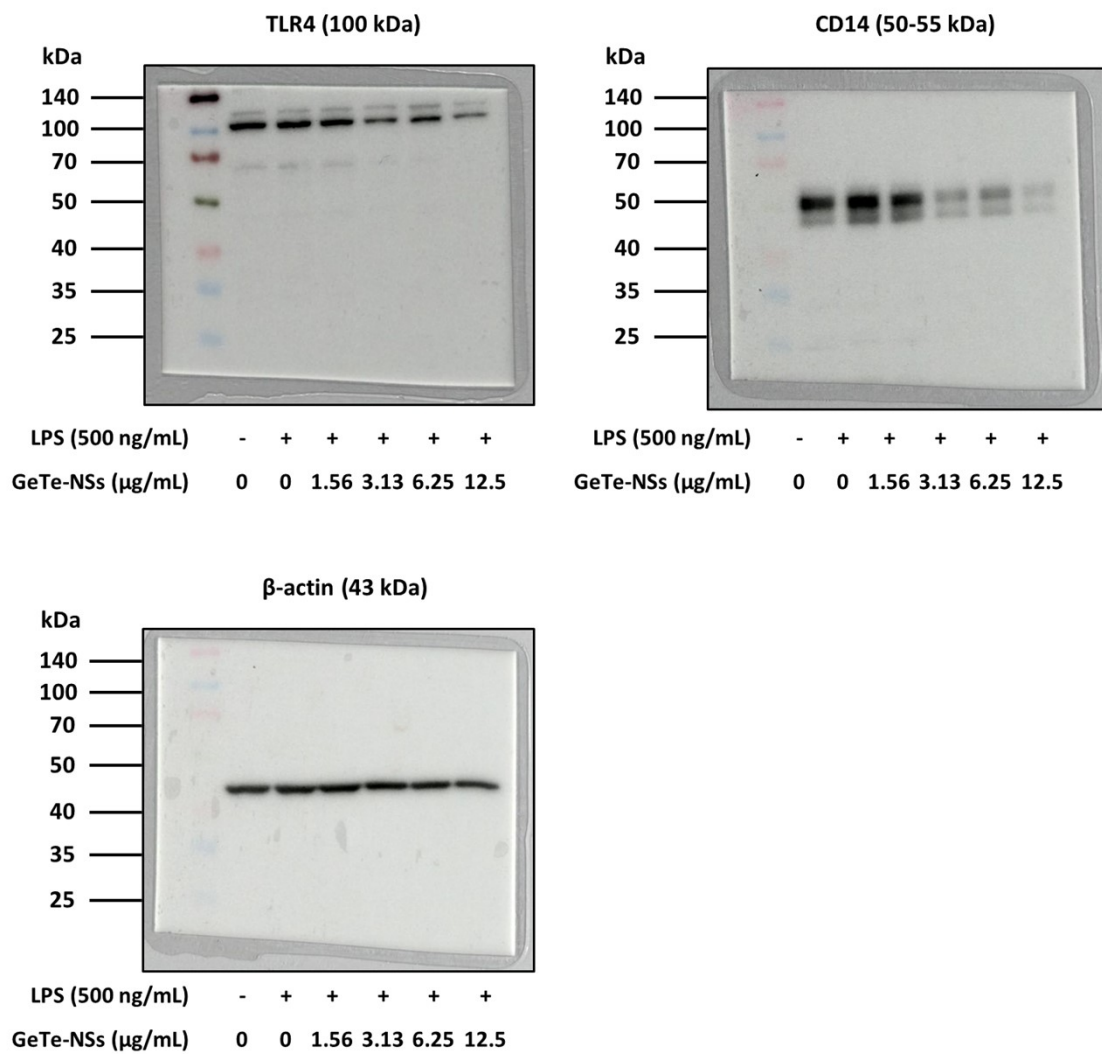

**Fig. S4** Uncropped Western blot images of TLR4 and CD14 proteins in RAW 264.7 cells. TLR4, CD14, and β-actin (stripped in order: TLR4 → CD14 → β-actin). The cropped versions of these blots are shown in Fig. 5c.

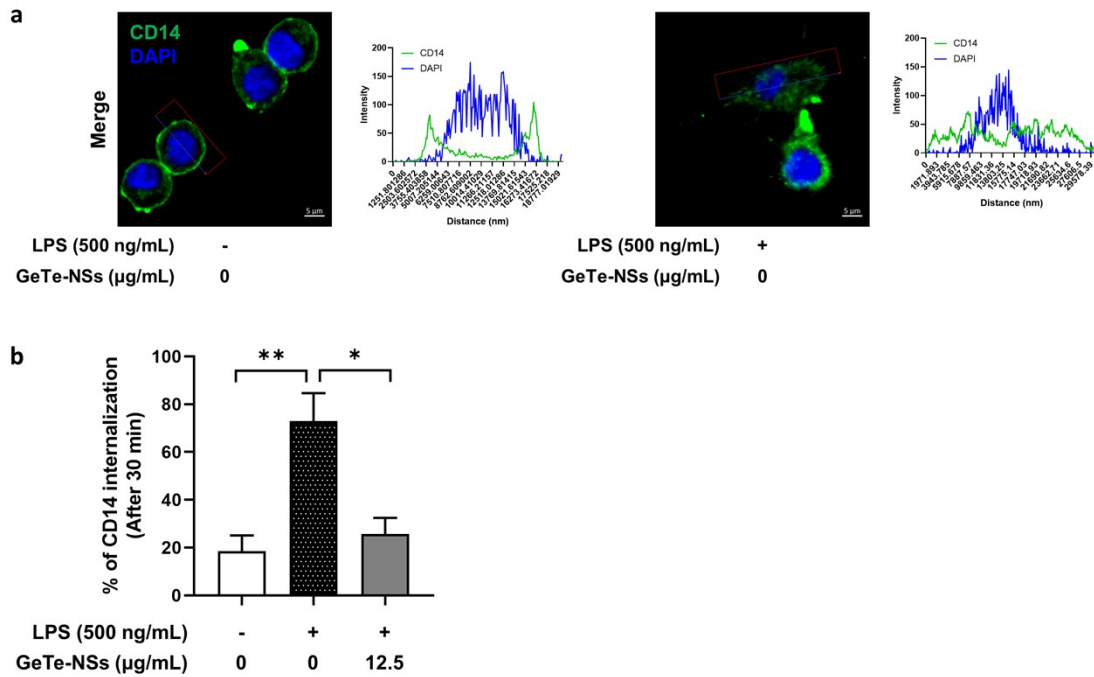

**Fig. S5.** After treatments as indicated for 30 min, RAW 264.7 cells were fixed and stained to assess CD14 internalization by immunofluorescence. (a) Cells on the left represent CD14-negative cells, exhibiting strong signals at the cell membrane but not in the cytoplasm, while cells on the right represent CD14-positive cells, with scattered signals in the cytoplasm. (Scale bar = 5 μm) (b) The percentage of CD14-positive cells was quantified for each group. 50–100 cells counted per samples ( $n = 3$ ). Statistical significance was determined by one-way ANOVA in comparison with the LPS-stimulated RAW 264.7 cells. \* $p < 0.05$ , \*\* $p < 0.01$ .

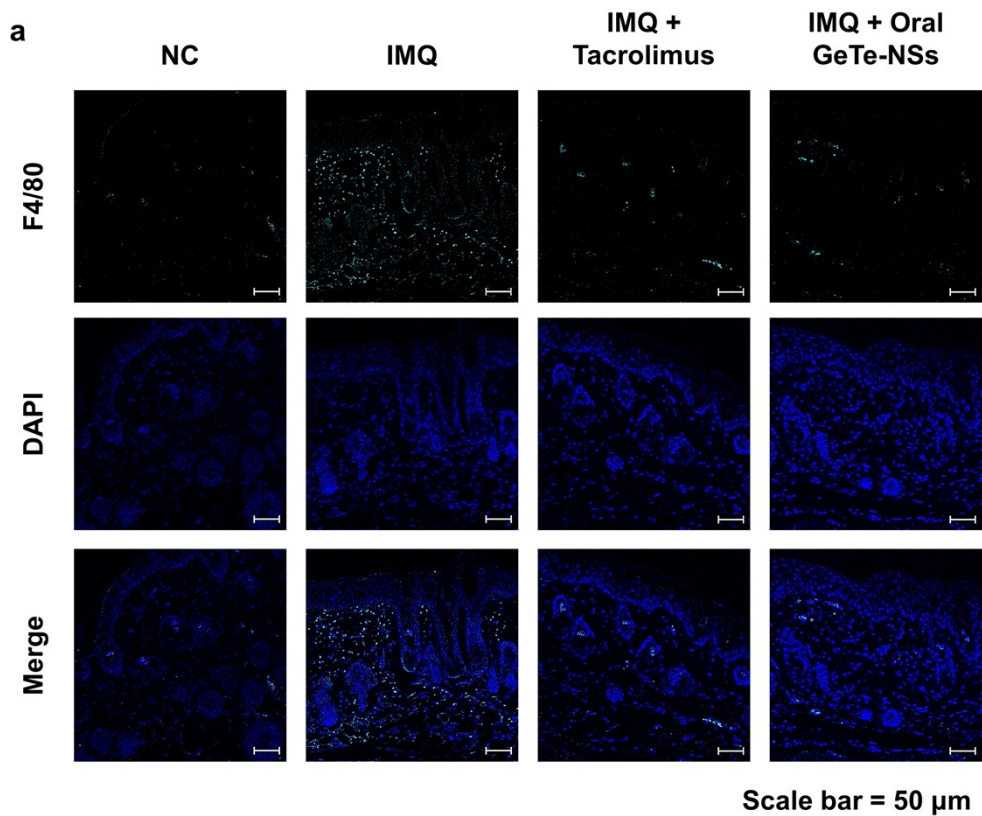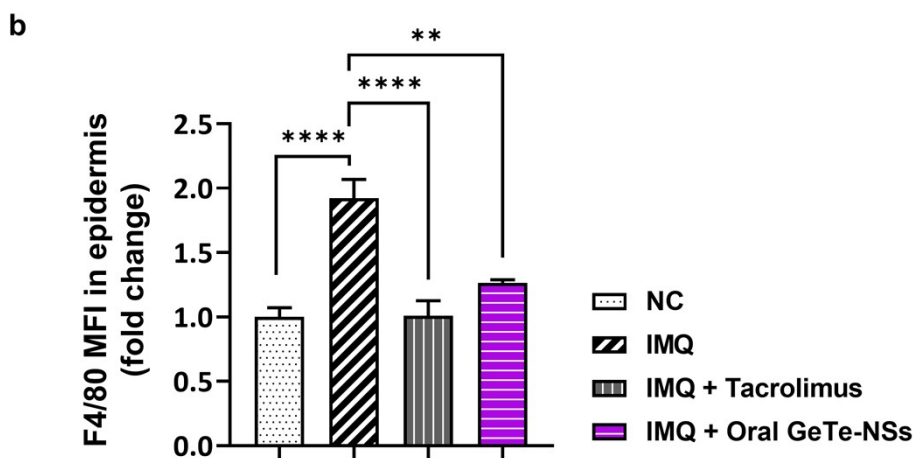

**Fig. S6.** Assessment of the different treatments on macrophage infiltration in the dermis. (a) Representative immunofluorescence staining images of F4/80 (light blue) and DAPI (blue) from each group (Scale bar = 50  $\mu$ m). (b) Quantification of the filaggrin mean fluorescence intensity (MFI) in the epidermal lesions ( $n = 4$ ). Statistical significance was determined by one-way ANOVA in comparison with the IMQ group. ns > 0.05, \*\* $p < 0.01$ , \*\*\*\* $p < 0.0001$ .

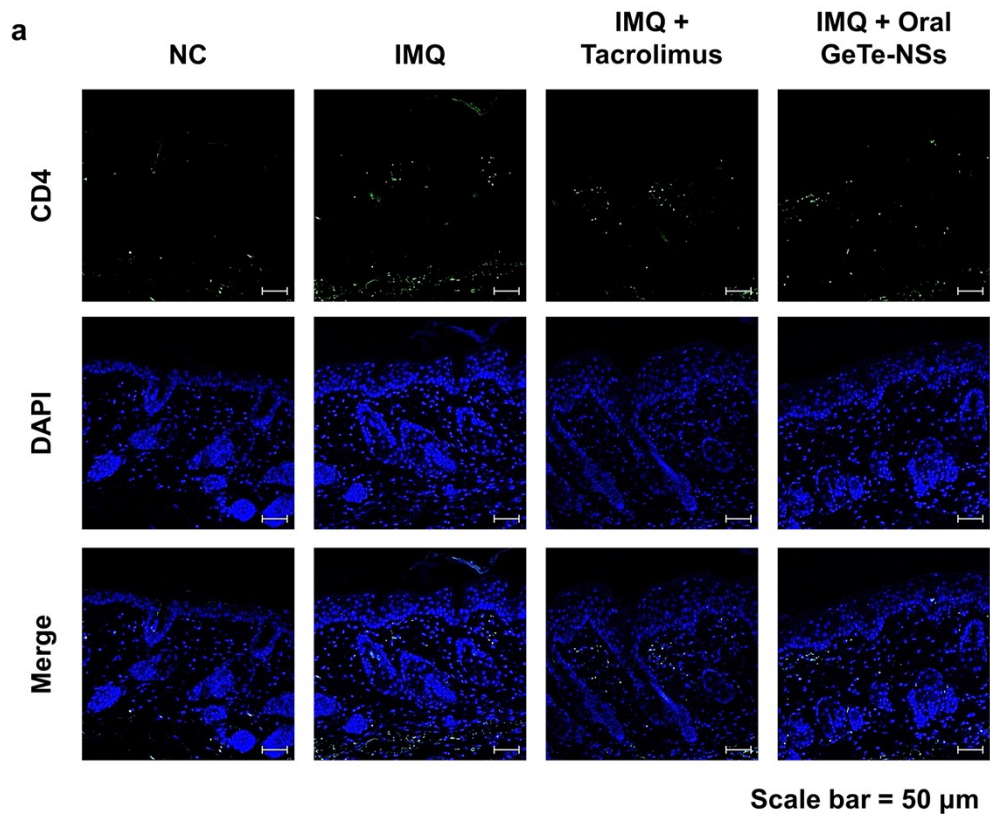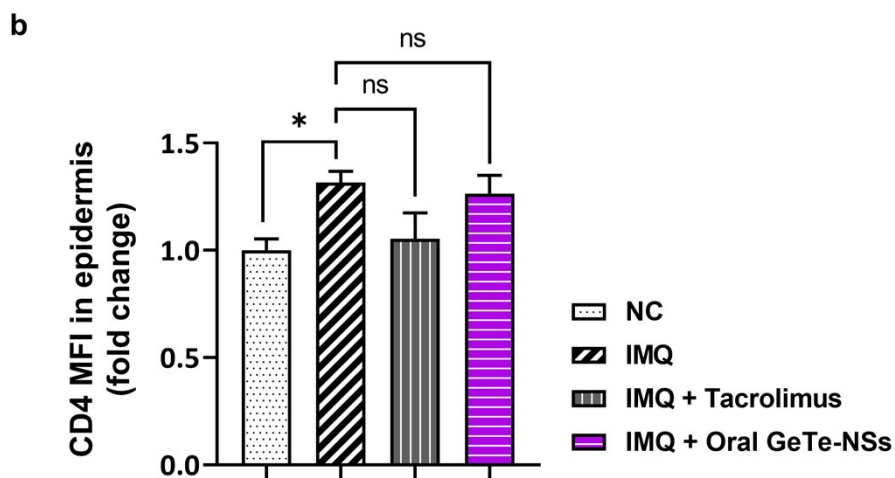

**Fig. S7.** Assessment of the different treatments on CD4<sup>+</sup> T cell infiltration in the dermis. (a) Representative immunofluorescence staining images of CD4 (green) and DAPI (blue) from each group (Scale bar = 50  $\mu$ m). (b) Quantification of the filaggrin mean fluorescence intensity (MFI) in the epidermal lesions ( $n = 4$ ). Statistical significance was determined by one-way ANOVA in comparison with the IMQ group. ns  $> 0.05$ , \* $p < 0.05$ .

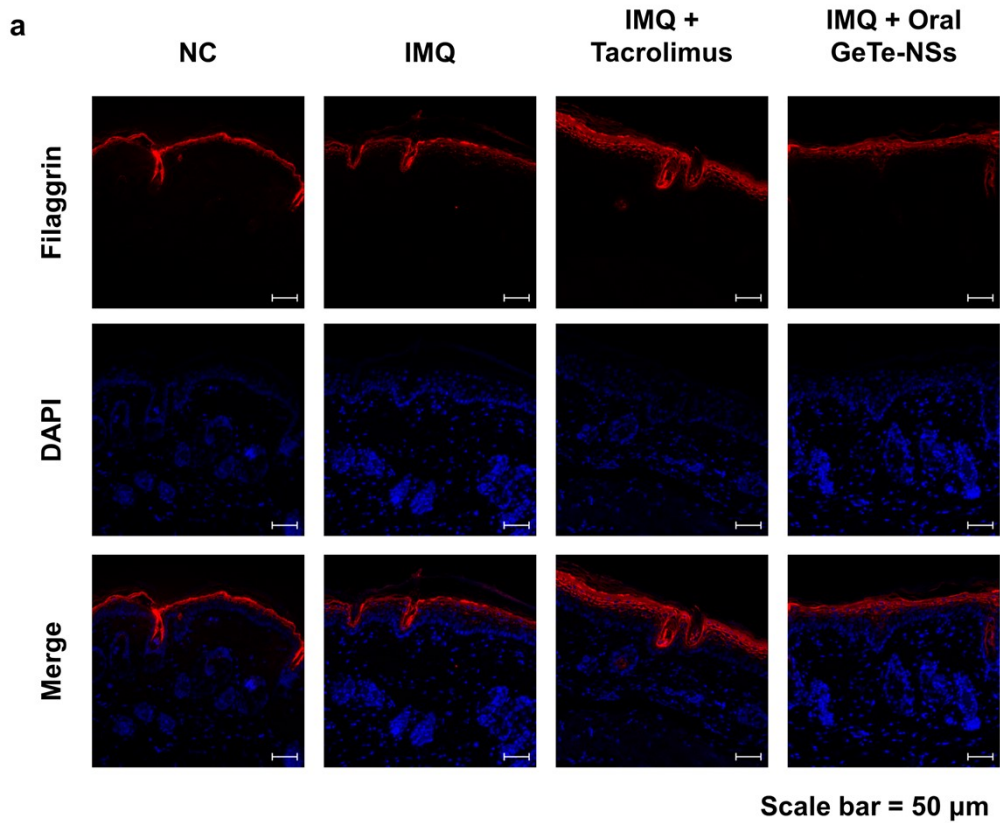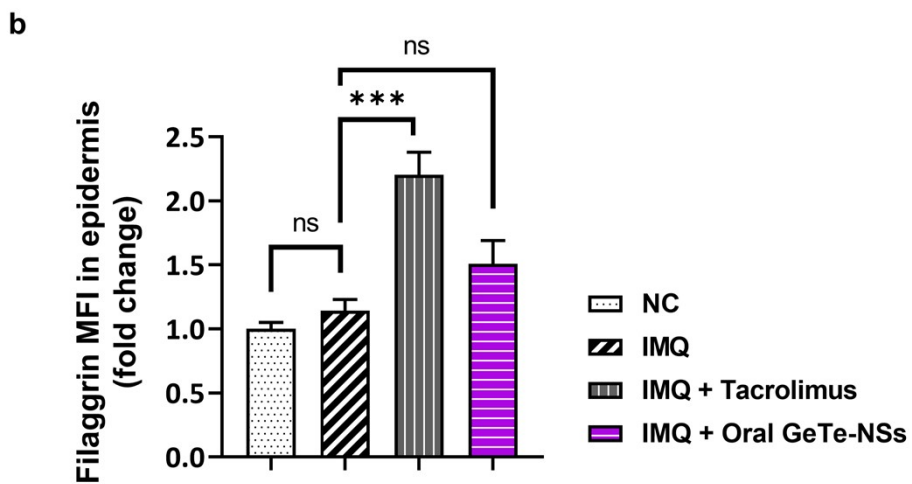

**Fig. S8.** Assessment of the different treatments on filaggrin expression in the epidermis. (a) Representative immunofluorescence staining images of filaggrin (red) and DAPI (blue) from each group (Scale bar = 50  $\mu$ m). (b) Quantification of the filaggrin mean fluorescence intensity (MFI) in the epidermal lesions ( $n = 4$ ). Statistical significance was determined by one-way ANOVA in comparison with the IMQ group. ns > 0.05, \*\*\* $p < 0.001$ .
